# Supplementary material for: Naphthyl “capped” triazole-linked calix[4]arene hosts as fluorescent chemosensors towards Fe3+and Hg2+: an experimental and DFT computational study
Source: Royal Society of Chemistry journal article supplement (doi:10.1039/c5nj01362c), 2015-11-06
Supplement: c5nj01362c1.pdf [file c5nj01362c1.pdf]

## SUPPLEMENTARY INFORMATION

### Naphthyl "capped" triazole-linked calix[4]arene hosts as fluorescent chemosensors towards $\text{Fe}^{3+}$ and $\text{Hg}^{2+}$ : an experimental and DFT computational study

Shofiur Rahman,\*<sup>a</sup> Yousif Assiri,<sup>a</sup> Abdullah N. Alodhayb,<sup>b</sup>

Luc Y. Beaulieu,<sup>b</sup> Ahmed K. Oraby,<sup>a</sup> and Paris E. Georghiou,\*<sup>a</sup>

<sup>a</sup> Department of Chemistry, Memorial University of Newfoundland, St. John's, Newfoundland and Labrador, Canada A1B3X7.

E-mail: [parisg@mun.ca](mailto:parisg@mun.ca) ; [msrahman@mun.ca](mailto:msrahman@mun.ca).

<sup>b</sup> Department of Physics and Physical Oceanography, Memorial University of Newfoundland, St. John's, Newfoundland and Labrador, Canada A1B3X7. E-mail: [lbeaulieu@mun.ca](mailto:lbeaulieu@mun.ca).

#### Table of Contents

|                                                                                               | <u>Page</u> |
|-----------------------------------------------------------------------------------------------|-------------|
| Computational study                                                                           | S3          |
| Table S1 DFT Calculated binding energies for <b>6a-d</b> complexes                            | S4          |
| Table S2 Selected parameter distances for <b>6a</b> complexes                                 | S5          |
| Table S3 Selected parameter distances for <b>6b</b> complexes                                 | S5          |
| Table S4 Selected parameter distances for <b>6c</b> complexes                                 | S6          |
| Table S5 Selected parameter distances for <b>6d</b> complexes                                 | S6          |
| Figure SI-1: Ball-and-stick structures of <b>6a</b> and <b>6a</b> ⊃ $\text{Fe}^{3+}$ complex  | S7          |
| Figure SI-2: Space fill structures of <b>6a</b> and <b>6a</b> ⊃ $\text{Fe}^{3+}$ complex      | S7          |
| Figure SI-3: Ball-and-stick structures of <b>6a</b> and <b>6a</b> ⊃ $\text{Hg}^{2+}$ complex  | S8          |
| Figure SI-4: Space fill structures of <b>6a</b> and <b>6a</b> ⊃ $\text{Hg}^{2+}$ complex      | S8          |
| Figure SI-5: Ball-and-stick structures of <b>6b</b> and <b>6b</b> ⊃ $\text{Fe}^{3+}$ complex  | S9          |
| Figure SI-6: Space fill structures of <b>6b</b> and <b>6b</b> ⊃ $\text{Fe}^{3+}$ complex      | S9          |
| Figure SI-7: Ball-and-stick structures of <b>6b</b> and <b>6b</b> ⊃ $\text{Hg}^{2+}$ complex  | S10         |
| Figure SI-8: Space fill structures of <b>6b</b> and <b>6b</b> ⊃ $\text{Hg}^{2+}$ complex      | S10         |
| Figure SI-9: Ball-and-stick structures of <b>6c</b> and <b>6c</b> ⊃ $\text{Fe}^{3+}$ complex  | S11         |
| Figure SI-10: Space fill structures of <b>6c</b> and <b>6c</b> ⊃ $\text{Fe}^{3+}$ complex     | S11         |
| Figure SI-11: Ball-and-stick structures of <b>6c</b> and <b>6c</b> ⊃ $\text{Hg}^{2+}$ complex | S12         |
| Figure SI-12: Space fill structures of <b>6c</b> and <b>6c</b> ⊃ $\text{Hg}^{2+}$ complex     | S12         |
